# Supplementary material for: Phylogenetic Relationships of Three Italian Merino-Derived Sheep Breeds Evaluated through a Complete Mitogenome Analysis
Source: PubMed Central journal article supplement (PMC3767607; doi:10.1371/journal.pone.0073712), 2013-09-09

Figure S1. Geographical sampling areas of the 291 sheep samples.

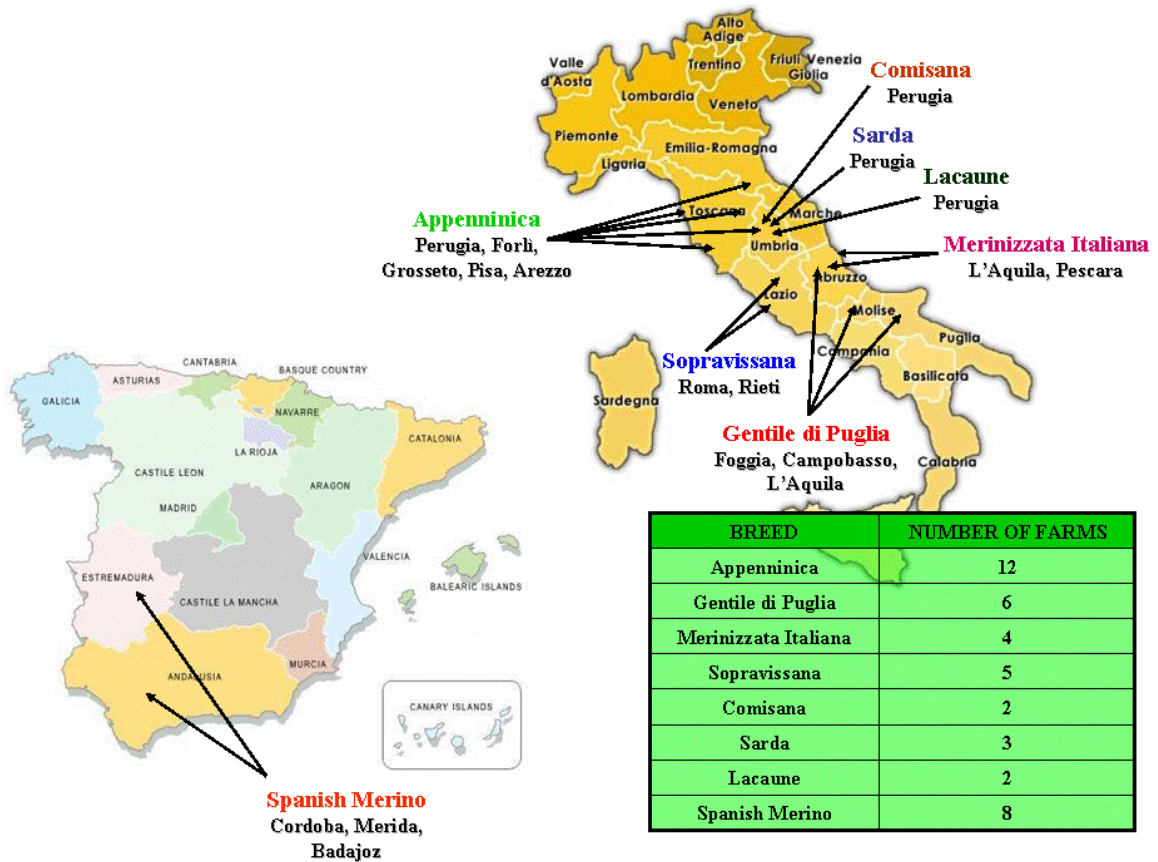

Supplement: pone.0073712.s001.pdf [file pone.0073712.s001.pdf]
