# Supplementary material for: Phylogenetic Relationships of Three Italian Merino-Derived Sheep Breeds Evaluated through a Complete Mitogenome Analysis
Source: PubMed Central journal article supplement (PMC3767607; doi:10.1371/journal.pone.0073712), 2013-09-09

**Figure S2. Nucleotide diversity variation ( $\pi$ ) along the entire mitogenome.**

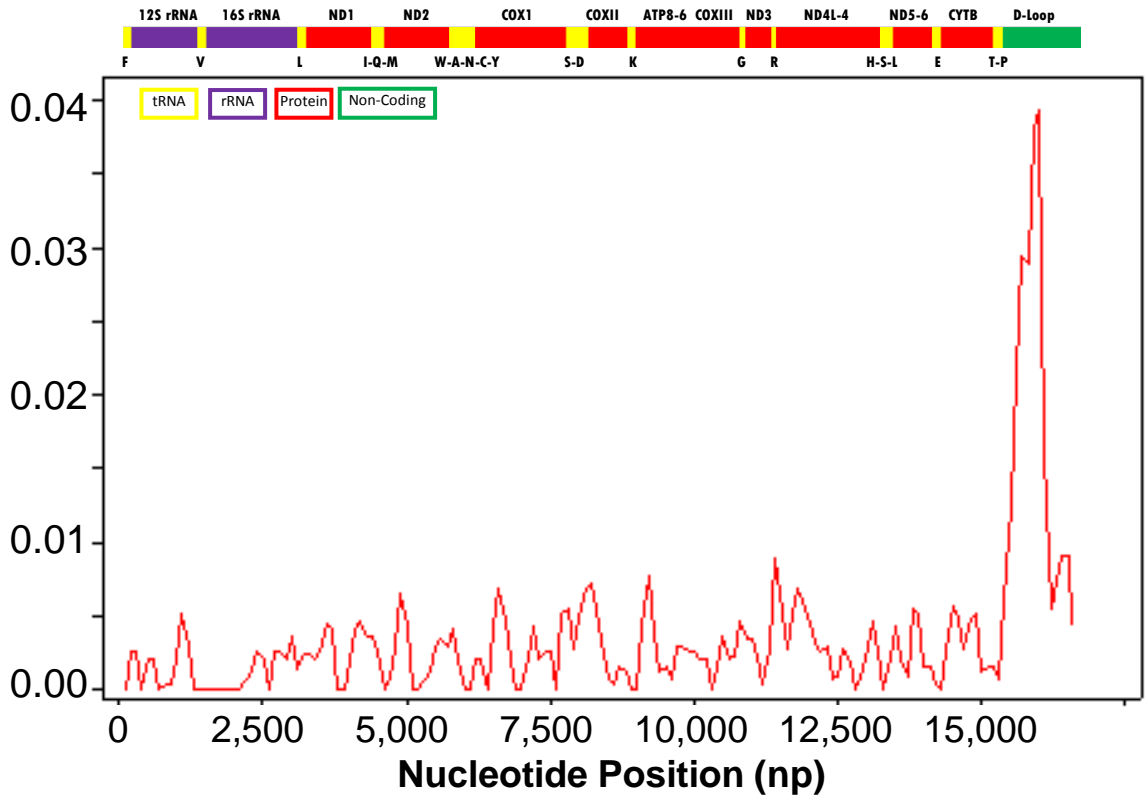

Supplement: pone.0073712.s002.pdf [file pone.0073712.s002.pdf]
